# Supplementary material for: Vacancy engineering modulates spin polarization to enhance the charge dynamics of CuIn5S8 for photocatalytic sterilization
Source: Royal Society of Chemistry journal article supplement (doi:10.1039/d3nj05482a), 2024-01-01
Supplement: d3nj05482a1.pdf [file d3nj05482a1.pdf]

*Supplementary Information*

**vacancy engineering modulates spin polarization to enhance  
charge dynamics of CuIn<sub>5</sub>S<sub>8</sub> for photocatalytic sterilization**

Wenbin Wu<sup>1</sup>, Jing Wang<sup>1</sup>, Xiaojie Liang<sup>1</sup>, Laixi Luo<sup>1</sup>, Yaohong Yang<sup>1</sup>, Fan Zhou<sup>1</sup>,  
Shuduan Deng<sup>1\*</sup>, Yumin Song<sup>2\*</sup>, Le Yang<sup>3\*</sup>, Kunyong Kang<sup>1\*</sup>

1. School of Materials Science and Engineering, Southwest Forestry University, Kunming 650224, China

2. Yunnan Key Laboratory of Metal-Organic Molecular Materials and Device, School of Chemistry and Chemical Engineering, Kunming University, Kunming 650214, China

3. Department of Cardiology, Shandong Provincial Hospital Affiliated to Shandong First Medical University, Jinan 250021, China

\*Corresponding author:

E-mail: kangkunyong@163.com. (Kunyong Kang);

E-mail: yangle@sdfmu.edu.cn. (Yang Le);

E-mail: dengshuduan@163.com. (Shuduan Deng);

E-mail: songyumin875@126.com. (Yumin Song).

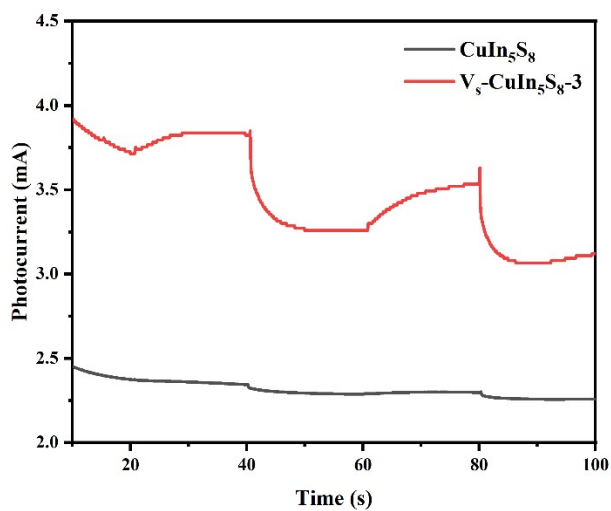

Fig. S1. photocurrent test of CuIn<sub>5</sub>S<sub>8</sub> and V<sub>5</sub>-CuIn<sub>5</sub>S<sub>8</sub>-3

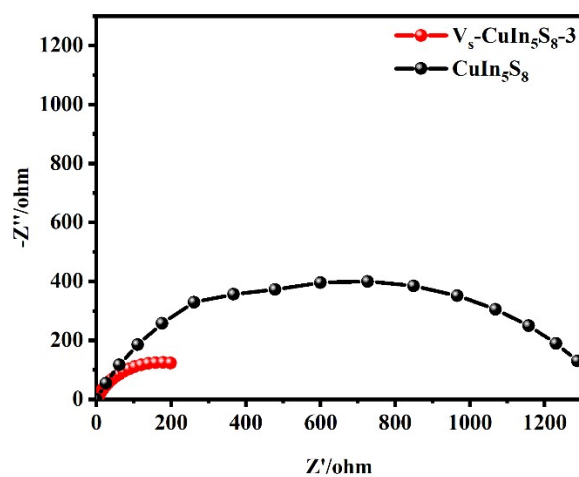

Fig. S2. EIS of CuIn<sub>5</sub>S<sub>8</sub> and V<sub>5</sub>-CuIn<sub>5</sub>S<sub>8</sub>-3

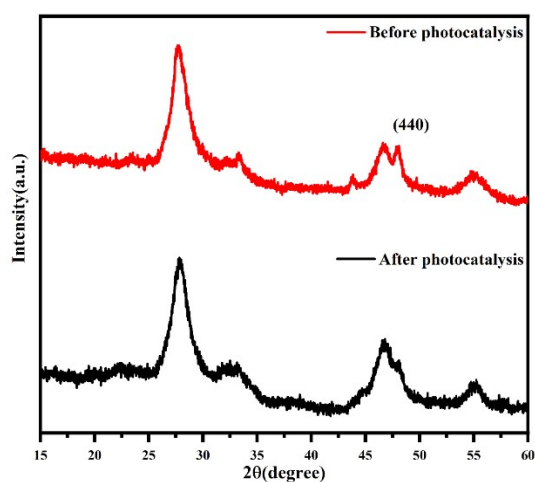

Fig. S3. XRD of before and after photocatalysis

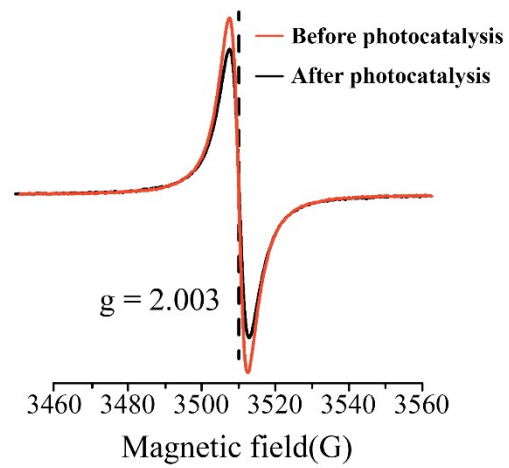

Fig. S4. ESR of before and after photocatalysis
